# Supplementary material
Source: PubMed Central journal article supplement (PMC5010514)
Supplement: NIHMS775784-supplement-2.pdf [file NIHMS775784-supplement-2.pdf]

Supplemental Table 1: Canine Clinical Trial of RT + CpG + 1MT

| Age | Sex    | Breed    | Primary Disease                 | Systemic Disease | Best Primary Response (WHO) | Best Systemic Response (irRC) | Survival (months) | Toxicity            |
|-----|--------|----------|---------------------------------|------------------|-----------------------------|-------------------------------|-------------------|---------------------|
| 10  | Female | Husky    | Melanoma - lingual              | Lung             | PR                          | Lung – irSD                   | 9.2               | Mucositis – Grade 2 |
| 8   | Female | Labrador | Soft Tissue Sarcoma – body wall | LN, Lung         | PR                          | LN – irPR<br>Lung – irSD      | 2.8               | Skin – Grade 1      |
| 11  | Male   | Mixed    | Melanoma-buccal                 | Lung             | PR                          | Lung – irPD                   | 3.2               | Mucositis – Grade 1 |
| 12  | Female | Terrier  | Melanoma-buccal                 | Lung             | CR                          | Lung – irCR                   | 5.6               | Mucositis – Grade 1 |
| 11  | Male   | Mixed    | Melanoma-maxillary              | Lung             | PR                          | Lung – irPR                   | 6                 | Mucositis – Grade 1 |

Canine melanoma median survival after development of metastatic disease:

This Study: 5.8 months (95% CI: 3.2-9.2 months)

Previously published historical controls treated with radiotherapy alone: 2 months (95% CI: 1-4 months)
